# Supplementary material for: RNA interference of trehalose-6-phosphate synthase and trehalase genes regulates chitin metabolism in two color morphs of Acyrthosiphon pisum Harris
Source: PubMed Central journal article supplement (PMC7806880; doi:10.1038/s41598-020-80277-2), 2021-01-13
Supplement: 41598_2020_80277_MOESM1_ESM.pdf [file 41598_2020_80277_MOESM1_ESM.pdf]

# RNA interference of trehalose-6-phosphate synthase and trehalase genes regulates chitin metabolism in two color morphs of *Acyrtosiphon pisum* Harris

Guang Wang<sup>1,2</sup>, Yuping Gou<sup>1,2</sup>, Sufan Guo<sup>1,2</sup>, Jing-Jiang Zhou<sup>1,2</sup>, and Changzhong Liu<sup>1,2,\*</sup>

<sup>1</sup> College of Plant Protection, Gansu Agricultural University, Lanzhou 730070, Gansu, China

<sup>2</sup> Biocontrol Engineering Laboratory of Crop Diseases and Pests of Gansu Province, Lanzhou 730070, Gansu, China

\* corresponding author: liuchzh@gsau.edu.cn

| genes        | Primer set | Primers sequence (5'-3')                          | Product Size (bp) |
|--------------|------------|---------------------------------------------------|-------------------|
| <i>ApTPS</i> | TPS-F      | GGATGCAACCTACCACCCAA                              | 421               |
|              | TPS-R      | CCCGGTAGTGATACGTCAGCT                             |                   |
| <i>ApTRE</i> | TRE-F      | GGCGTGGTTTACTGGGATA                               | 416               |
|              | TRE-R      | CAACCAAAACCTGTCTGCGG                              |                   |
| <i>GFP</i>   | GFP-F      | AAGGGCGAGGAGCTGTTCACCG                            | 688               |
|              | GFP-R      | CAGCAGGACCATGTGATCGCGC                            |                   |
| <i>dsTPS</i> | dsTPS-F    | <u>TAATACGACTCACTATAGGGGGATGCAACCTACCACCCAA</u>   | 421               |
|              | dsTPS-R    | <u>TAATACGACTCACTATAGGGCCCGGTAGTGATACGTCAGC</u>   |                   |
| <i>dsTRE</i> | dsTRE-F    | <u>TAATACGACTCACTATAGGGGGCGTGGTTTACTGGGATA</u>    | 416               |
|              | dsTRE-R    | <u>TAATACGACTCACTATAGGGCAACCAAAACCTGTCTGCGG</u>   |                   |
| <i>dsGFP</i> | dsGFP-F    | <u>TAATACGACTCACTATAGGGAAGGGCGAGGAGCTGTTCACCG</u> | 688               |
|              | dsGFP-R    | <u>TAATACGACTCACTATAGGGCAGCAGGACCATGTGATCGCGC</u> |                   |

**Supplementary Table 1.** PCR primers used for dsRNA synthesis in this study. T7 RNA promoter sequence: TAATACGACTCACTATAGGG

| Gene            | GeneBank number | Primer set | Forward (5'-3')           | Reverse (5'-3')              | Product size (bp) |
|-----------------|-----------------|------------|---------------------------|------------------------------|-------------------|
| <i>ApTPS</i>    | XM_001943581.4  | QTPS       | ACCGACCGTGCCAATTCGTTT     | CGAAACCAAGGGGGCTGTTT         | 136               |
| <i>ApTRE</i>    | XM_003245847.4  | QTRE       | CGCATTGTACGCTGGTCATT      | AGTTGGACCCTGAGACTCCT         | 80                |
| <i>ApHK</i>     | XM_003242192.3  | QHK        | CCTTGAAGGTCTGAGCGAGATGG   | GGATACGCACTCACAGATGTACCG     | 86                |
| <i>ApGPI</i>    | XM_022320851.1  | QGPI       | CTGCTAAAGATGAATCCAGTGTTG  | ACCAAAGTGAGTAACGTCCAC        | 138               |
| <i>ApGFAT</i>   | XM_003246505.3  | QGFAT      | AATACATTGACACCATCCCCG     | TCCCTGGATTTTCGGTGTAAAG       | 115               |
| <i>ApGPN</i>    | NM_001162048.2  | QGPN       | AGCGTCACTCAGCAGATGTATTCG  | AATTCTACCGCGTTGTCCACAGAG     | 168               |
| <i>ApUAP</i>    | XM_015507631.1  | QUAP       | CTGCTGCAGGCTACACTCAA      | AGCTTCTAGGCACCAACTGC         | 119               |
| <i>Apchs-2</i>  | XM_003247469.3  | QCHS       | TGGCTTCTATCTCAAACGTGG     | GTCCCATCTCCTGTTTCATCC        | 144               |
| <i>ApGP</i>     | XM_022305439.1  | QGP        | GGTCTGGCAGCTTATGGTTACGG   | CGTCTGGTCTTCGGTCTGTTAC       | 91                |
| <i>ApCHT1</i>   | HM001231.1      | QCHT1      | GTCAAGCACCCTGGTCTTAACG    | GGCTGCTAACCAATCATCGACTCC     | 100               |
| <i>ApCHT2</i>   | XM_001943003.4  | QCHT2      | ACGTCATCACCCTACTACAACAC   | GCTTCGTCGTCGTCGGCTTC         | 109               |
| <i>ApCHT3</i>   | XM_015513030.1  | QCHT3      | GGTGGAGTTATGATATGGTCTGTAG | GTAGCTTCATATGGTCCGTCG        | 143               |
| <i>ApCHT5</i>   | XM_016803409.1  | QCHT5      | CAGCGAGCACGACCAATGTAGC    | CCGTGTGTGTCGTTGGCGTTAATG     | 180               |
| <i>ApCHT6</i>   | XM_008184636.2  | QCHT6      | AATCGTGGTCCGTGACCTAA      | TGCGGTTCTGAATGTCCAAG         | 168               |
| <i>ApCHT7</i>   | XM_008185544.2  | QCHT7      | CCGTAGAAGGTGTGCCACAAGAC   | GATCCAGTGTCCATTGTCCAGCAG     | 150               |
| <i>ApCHT8</i>   | XM_001945435.4  | QCHT8      | CCGGCATATCAGCGCAGATCAC    | ACAATCTTGGTCTTCAGCCATCG      | 183               |
| <i>ApCHT10</i>  | XM_022323068.1  | QCHT10     | GGTGGAGTTATGATATGGTCTGTAG | TTCTGTGGCTTCATATGGTC         | 148               |
| <i>ApIDGF</i>   | NM_001168671.1  | QIDGF      | GGCACGTATACTAAGACCGAAG    | GCAAACGGAAAGCATAGGTTTC       | 148               |
| <i>ApENGase</i> | XM_001949910.4  | QENGase    | ACGGTGAAGCAGTTATAGGC      | GGGAGTCATAGGGCTTTAATGC       | 150               |
| <i>ApCDA</i>    | XM_003244847.3  | QCDA       | TCATTACACGAACCCACACG      | TTGTTCGTCACCTTCGTCAG         | 148               |
| <i>ApKNK</i>    | XM_001950790.4  | QKNK       | TTATGGGGGCAACAACCCCTC     | AACATAATGGGCCCGCAGAA         | 179               |
| <i>rpL27</i>    | CN584874        | QrpL27     | CCGAAAAGCTGTCATAATGAAGACC | GGTGAAACCTTGCTACTGTTACATCTTG | 231               |

**Supplementary Table 2.** RT-qPCR primers used in this study. The abbreviations are *ApTPS*: trehalose-6-phosphate synthase gene, *ApTRE*: trehalase gene, *ApHK*: hexokinase gene, *ApGPI*: glucose-6-phosphate isomerase gene, *ApGFAT*: glutamine-fructose-6-phosphate aminotransferase gene, *ApGPN*: glucosamine-6-phosphate-N-acetyltransferase gene, *ApPGM*: phosphoacetylglucosamine mutase gene, *ApUAP*: UDP-N-acetylglucosamine pyrophosphorylase gene, *Apchs-2*: chitin synthase gene 2, *ApGP*: glycogen phosphorylase gene, *ApCht1, 2, 3, 5, 6, 7, 8* and *10*: eight chitinase-like genes 1, 2, 3, 5, 6, 7, 8 and 10 genes, *ApIDGF*: imaginal disk growth factor gene, *ApENGase*: endo-beta-N-acetylglucosaminidase gene, *ApCDA*: chitin deacetylase gene, *ApKNK*: knickkopf protein gene and *rpL27*: ribosomal protein L27 gene.

| Pathway             | Gene           | Red <i>A. pisum</i> |      |       |      | Green <i>A. pisum</i> |      |       |      |
|---------------------|----------------|---------------------|------|-------|------|-----------------------|------|-------|------|
|                     |                | dsTPS               |      | dsTRE |      | dsTPS                 |      | dsTRE |      |
|                     |                | 24 h                | 48 h | 24 h  | 48 h | 24 h                  | 48 h | 24 h  | 48 h |
| Chitin biosynthesis | <i>ApTPS</i>   | ↓                   | ↓    | ↓     | ×    | ↓                     | ↓    | ↓     | ↑    |
|                     | <i>ApTRE</i>   | ↓                   | ↓    | ↓     | ↓    | ↓                     | ×    | ↓     | ↓    |
|                     | <i>ApHK</i>    | ↓                   | ↓    | ↑     | ×    | ↓                     | ↑    | ↓     | ↑    |
|                     | <i>ApGPI</i>   | ↓                   | ↓    | ↓     | ↑    | ↓                     | ↑    | ↓     | ↑    |
|                     | <i>ApGFAT</i>  | ↓                   | ↓    | ↓     | ↓    | ↓                     | ↑    | ↓     | ×    |
|                     | <i>ApGPN</i>   | ↓                   | ↑    | ×     | ×    | ×                     | ×    | ×     | ↓    |
|                     | <i>ApUAP</i>   | ↓                   | ↓    | ↓     | ↓    | ↓                     | ↓    | ↓     | ↓    |
|                     | <i>Apchs-2</i> | ↓                   | ↓    | ×     | ×    | ↓                     | ↓    | ×     | ×    |
|                     | <i>ApGP</i>    | ↓                   | ↓    | ↓     | ×    | ↓                     | ↑    | ↓     | ↓    |
| Cuticle synthesis   | <i>ApCDA</i>   | ↓                   | ↓    | ×     | ↑    | ↓                     | ↑    | ×     | ↑    |
|                     | <i>ApKNK</i>   | ↓                   | ↓    | ↓     | ↓    | ↓                     | ↓    | ↓     | ↓    |
| Chitin degradation  | <i>Cht1</i>    | ↓                   | ↑    | ↓     | ↑    | ↓                     | ↓    | ↑     | ↓    |
|                     | <i>Cht2</i>    | ↓                   | ↓    | ↓     | ↓    | ↓                     | ↓    | ↓     | ↓    |
|                     | <i>Cht3</i>    | ↓                   | ×    | ↓     | ↓    | ↓                     | ×    | ↑     | ↓    |
|                     | <i>Cht5</i>    | ↓                   | ↓    | ↓     | ×    | ↓                     | ↓    | ↓     | ↓    |
|                     | <i>Cht6</i>    | ↓                   | ↑    | ↓     | ↓    | ↑                     | ×    | ↑     | ↑    |
|                     | <i>Cht7</i>    | ↓                   | ↓    | ↓     | ↑    | ↓                     | ↑    | ↓     | ×    |
|                     | <i>Cht8</i>    | ↓                   | ↓    | ↓     | ↓    | ↓                     | ↑    | ↓     | ↓    |
|                     | <i>Cht10</i>   | ↓                   | ↓    | ×     | ↓    | ×                     | ↑    | ↓     | ↑    |
|                     | <i>IDGF</i>    | ×                   | ↑    | ×     | ↑    | ↓                     | ×    | ×     | ×    |
|                     | <i>ENGase</i>  | ↓                   | ↓    | ↓     | ×    | ↓                     | ↓    | ×     | ↓    |

**Supplementary Table 3.** The down/up-regulation of genes related to chitin metabolism by knockdown of *ApTRE* and *ApTPS* expression with RNAi. ↓, down-regulation mRNA expression; ×, no difference; ↑, up-regulation mRNA expression.

**A**

|                |                                                                                                          |                         |                                                    |     |
|----------------|----------------------------------------------------------------------------------------------------------|-------------------------|----------------------------------------------------|-----|
| XM_001950229.4 | TACAAGAAGTTATGTGGAGACCAGACCTAGG                                                                          | GGCGTGGTTTGCCTGGGATA    | GTTGAATAATAAAAAGTCGAGAATATTTTTTCGTTTCCAATATTTGTACC | 100 |
| XM_016808594.2 | TGACGGCGGTGCTGTGGCACCAGGAAGTAGC                                                                          | CGCGTGGCTGGACTATGCTAT   | GCTGAACGAAATCAAGCGTGATTTACTTTTACCCAACCAATATATCACC  | 100 |
| XM_003247977.3 | TGACGGCGGTGCTGTGGCACCAGGAAGTAGC                                                                          | CGCGTGGCTGGACTATGCTAT   | GCTGAACGAAATCAAGCGTGATTTACTTTTACCCAACCAATATATCACC  | 100 |
| XM_029491831.1 | TGACGGCGGTGCTGTGGCACCAGGAAGTAGC                                                                          | CGCGTGGCTGGACTATGCTAT   | GCTGAACGAAATCAAGCGTGATTTACTTTTACCCAACCAATATATCACC  | 100 |
| XM_003245847.4 | TACAAGAAGTTATGTGGAGACCAGACCTAGG                                                                          | GGCGTGGTTTGCCTGGGATA    | GTTGAATAATAAAAAGTCGAGAATATTTTTTCGTTTCCAATATTTGTACC | 100 |
| PCR product    | ..... Primer Forward 5'                                                                                  | -GGCGTGGTTTGCCTGGGATA   | GTCG..CAAAGAAAGAGGAGTAGTAA.....GAGAAAAGCATG..ACC   | 38  |
| Consensus      |                                                                                                          |                         | g g a a g ga ta a at acc                           |     |
| XM_001950229.4 | TCTATGGACAGAAAGCTACAATATGCGGAAAAAGGCTGTAGCTAGTTCAGTGTGGGATATCTAAGAGATCATCATATCATCGAAGCCGATTTACTGTG       |                         |                                                    | 200 |
| XM_016808594.2 | GCTATGGACTGGCTGTATGAC...COGAAGAAGACCGA...TGACTTTGTGTCCGAAACGCTTAAATACT...TGAAAAAGACACAGATAATG...AAC      |                         |                                                    | 188 |
| XM_003247977.3 | GCTATGGACTGGCTGTATGAC...COGAAGAAGACCGA...TGACTTTGTGTCCGAAACGCTTAAATACT...TGAAAAAGACACAGATAATG...AAC      |                         |                                                    | 188 |
| XM_029491831.1 | GCTATGGACTGGCTGTATGAC...COGAAGAAGACCGA...TGACTTTGTGTCCGAAACGCTTAAATACT...TGAAAAAGACACAGATAATG...AAC      |                         |                                                    | 188 |
| XM_003245847.4 | TCTATGGACAGAAAGCTACAATATGCGGAAAAAGGCTGTAGCTAGTTCAGTGTGGGATATCTAAGAGATCATCATATCATCGAAGCCGATTTACTGTG       |                         |                                                    | 200 |
| PCR product    | GCTATGGACAGAAAGCTACAATATGCGGAAAAAGGCTGTAGCTAGTTCAGTGTGGGATATCTAAGAGATCATCATATCATCGAAGCCGATTTACTGTG       |                         |                                                    | 138 |
| Consensus      | ctatggac g g ta a coga aag c g t t gtgt ga ct a a a t a ga c gat at                                      |                         |                                                    |     |
| XM_001950229.4 | AATTTTAAACGGAACACTACGCTCTTTGTACAATTCATCACAACAGTGGGACTTCCCAAATGCGTGGCCTCCCTACAAAGCTTTCATCATTTCAAGGCTCTAG  |                         |                                                    | 300 |
| XM_016808594.2 | AACCTGGGTGGCATAACGACCACACTGGAGCACTCCGGTGAACAGTGGGACTACCCGAACGCGTGGCCTCCGCTCCAGTACATAATGGTCATGTCACCTCG    |                         |                                                    | 288 |
| XM_003247977.3 | AACCTGGGTGGCATAACGACCACACTGGAGCACTCCGGTGAACAGTGGGACTACCCGAACGCGTGGCCTCCGCTCCAGTACATAATGGTCATGTCACCTCG    |                         |                                                    | 288 |
| XM_029491831.1 | AACCTGGGTGGCATAACGACCACACTGGAGCACTCCGGTGAACAGTGGGACTACCCGAACGCGTGGCCTCCGCTCCAGTACATAATGGTCATGTCACCTCG    |                         |                                                    | 288 |
| XM_003245847.4 | AATTTTAAACGGAACACTACGCTCTTTGTACAATTCATCACAACAGTGGGACTTCCCAAATGCGTGGCCTCCCTACAAAGCTTTCATCATTTCAAGGCTCTAG  |                         |                                                    | 300 |
| PCR product    | AATTTTAAACGGAACACTACGCTCTTTGTACAATTCATCACAACAGTGGGACTTCCCAAATGCGTGGCCTCCCTACAAAGCTTTCATCATTTCAAGGCTCTAG  |                         |                                                    | 238 |
| Consensus      | aa t gg a acc ac c tg a a tc aacagtgggact ccc aa ggtggcctcc ct ca t at t ct g                            |                         |                                                    |     |
| XM_001950229.4 | ACAGGACACAAACAGAAACTGGCACAACAGGTGTCAATTTAGATTGGCTGAAGTTTGGTTACGCTCAAATTTATAAATCATTTGCGAGAGAAATCAATG..ATG |                         |                                                    | 398 |
| XM_016808594.2 | ACAACCTCGGGCGACAACCTGGCCAGGACTTGGCGTTGCGATAGCTGAAACGATGGATGAGGTCCAACACAAAGCGT..ATAACGAGACCAACGCCAATG     |                         |                                                    | 386 |
| XM_003247977.3 | ACAACCTCGGGCGACAACCTGGCCAGGACTTGGCGTTGCGATAGCTGAAACGATGGATGAGGTCCAACACAAAGCGT..ATAACGAGACCAACGCCAATG     |                         |                                                    | 386 |
| XM_029491831.1 | ACAACCTCGGGCGACAACCTGGCCAGGACTTGGCGTTGCGATAGCTGAAACGATGGATGAGGTCCAACACAAAGCGT..ATAACGAGACCAACGCCAATG     |                         |                                                    | 386 |
| XM_003245847.4 | ACAGGACACAAACAGAAACTGGCACAACAGGTGTCAATTTAGATTGGCTGAAGTTTGGTTACGCTCAAATTTATAAATCATTTGCGAGAGAAATCAATG..ATG |                         |                                                    | 398 |
| PCR product    | ACAGGACACAAACAGAAACTGGCACAACAGGTGTCAATTTAGATTGGCTGAAGTTTGGTTACGCTCAAATTTATAAATCATTTGCGAGAGAAATCAATG..ATG |                         |                                                    | 336 |
| Consensus      | aca c a aa ggc ca a tg c tt t gctgaa tgg t g tc aa ta aaa c t a ga a caa g atg                           |                         |                                                    |     |
| XM_001950229.4 | TTCGAAAAATATGATGTTCTAGCATCGGAGAAACTGGTGGCGTGGTGAATATAT                                                   | CCGCAGACAGGTTTGGTTGA    | CAAATGGAGTCGTTGTTGAGT                              | 498 |
| XM_016808594.2 | TATGAAAAATACGATGCGACCGTACCCGGAGGTCATGGCAGTGGAGTGAATAACG                                                  | GGTGCAGCTAGGTTTCGGCTGA  | CCAACGGCATAATCTTTGGAGT                             | 486 |
| XM_003247977.3 | TATGAAAAATACGATGCGACCGTACCCGGAGGTCATGGCAGTGGAGTGAATAACG                                                  | GGTGCAGCTAGGTTTCGGCTGA  | CCAACGGCATAATCTTTGGAGT                             | 486 |
| XM_029491831.1 | TATGAAAAATACGATGCGACCGTACCCGGAGGTCATGGCAGTGGAGTGAATAACG                                                  | GGTGCAGCTAGGTTTCGGCTGA  | CCAACGGCATAATCTTTGGAGT                             | 486 |
| XM_003245847.4 | TTCGAAAAATATGATGTTCTAGCATCGGAGAAACTGGTGGCGTGGTGAATATAT                                                   | CCGCAGACAGGTTTGGTTGA    | CAAATGGAGTCGTTGTTGAGT                              | 498 |
| PCR product    | TTCGAAAAATATGATGTTCTAGCATCGGAGAAACTGGTGGCGTGGTGAATATAT                                                   | CCGCAGACAGGTTTGGTTGA    | CAAATGGAGTCGTTGTTGAGT                              | 416 |
| Consensus      | t gaaaaata gatg g a c ggag Primer Reverse 5'                                                             | -CCGCAGACAGGTTTGGTTG-3' |                                                    |     |

**B**

|                |                                                                                                        |                         |                                                |     |
|----------------|--------------------------------------------------------------------------------------------------------|-------------------------|------------------------------------------------|-----|
| XM_003244776.4 | GGTGACAGCGATGCAAAACGGGGTATCAG                                                                          | GGATGCAACCTACCACC       | AGCATGCAACTGCAGCTGGATGATTTGACATGTACCTGAGCAACCA | 100 |
| XM_001943581.5 | GGTGACAGCGATGCAAAACGGGGTATCAG                                                                          | GGATGCAACCTACCACC       | AGCATGCAACTGCAGCTGGATGATTTGACATGTACCTGAGCAACCA | 100 |
| PCR product    | ..... Primer Forward 5'                                                                                | -GGATGCAACCTACCACC-3'   | .....GAGCTGG.TGATTTGAC.TGTATCTGAGCAACCA        | 35  |
| Consensus      |                                                                                                        |                         | agctgg tgatttggac tgta ctgagcaaccaca           |     |
| XM_003244776.4 | TTGCGGGCGCTGGCAAGCTGAGTCTGATCTTTGGACTACGACGGCAGCTCAACGCACTCAAGTACACACCCGACCTGGCCGTTATGTTCCGAGGAGACGGT  |                         |                                                | 200 |
| XM_001943581.5 | TTGCGGGCGCTGGCAAGCTGAGTCTGATCTTTGGACTACGACGGCAGCTCAACGCACTCAAGTACACACCCGACCTGGCCGTTATGTTCCGAGGAGACGGT  |                         |                                                | 200 |
| Consensus      | ttgCGGGCGctggcaagctgagTctgatctttggactacgacggcagctcaacgcactcaagTAcacacccgacctggccgTtAtgttccgagGagacggT  |                         |                                                | 135 |
| XM_003244776.4 | CAAGGTGCTGCAGCGGCTCAGCCGAATGCOGGACGTGAACATCGCCATCATTTTCAGGCOGAAACGCTGGACAACTGCAAGTCGATGTTGGCCATCGAGAAC |                         |                                                | 300 |
| XM_001943581.5 | CAAGGTGCTGCAGCGGCTCAGCCGAATGCOGGACGTGAACATCGCCATCATTTTCAGGCOGAAACGCTGGACAACTGCAAGTCGATGTTGGCCATCGAGAAC |                         |                                                | 300 |
| PCR product    | CAAGGTGCTGCAGCGGCTCAGCCGAATGCOGGACGTGAACATCGCCATCATTTTCAGGCOGAAACGCTGGACAACTGCAAGTCGATGTTGGCCATCGAGAAC |                         |                                                | 235 |
| Consensus      | caaggtgctgcagcgGctcagccgaatgcoGGacgtgaaCATCGccATcAtttTCagGcoGaaacGctggacAActGcaagTcGatgTtggccATcgagaac |                         |                                                |     |
| XM_003244776.4 | GTGACGTACCGGGCAGCCACGGTATCGAGATCTGCACCCAGACGGCACCACCTTCGTGCACCCGGTCCGACGCGATGAGCAAAAGGTGGCCGAGC        |                         |                                                | 400 |
| XM_001943581.5 | GTGACGTACCGGGCAGCCACGGTATCGAGATCTGCACCCAGACGGCACCACCTTCGTGCACCCGGTCCGACGCGATGAGCAAAAGGTGGCCGAGC        |                         |                                                | 400 |
| PCR product    | GTGACGTACCGGGCAGCCACGGTATCGAGATCTGCACCCAGACGGCACCACCTTCGTGCACCCGGTCCGACGCGATGAGCAAAAGGTGGCCGAGC        |                         |                                                | 335 |
| Consensus      | gtgacgtacCGggcagccacggTatcgagatctgcacccagacggcaccaccttcgtgcacccggTccgacGcgatgagcaaaaggtggccgagc        |                         |                                                |     |
| XM_003244776.4 | TGCAGAAGGTGCTCGCGGACGAGGTGTGCGGGACGGTGTCTGGTGGGAAACAAGGGCGTGA                                          | GCTGACGTATCACTACCGGG    | AGGTGCGGGTCCGCT                                | 500 |
| XM_001943581.5 | TGCAGAAGGTGCTCGCGGACGAGGTGTGCGGGACGGTGTCTGGTGGGAAACAAGGGCGTGA                                          | GCTGACGTATCACTACCGGG    | AGGTGCGGGTCCGCT                                | 500 |
| PCR product    | TGCAGAAGGTGCTCGCGGACGAGGTGTGCGGGACGGTGTCTGGTGGGAAACAAGGGCGTGA                                          | GCTGACGTATCACTACCGGG    | AGGTGCGGGTCCGCT                                | 421 |
| Consensus      | tgcaagaaggtgctcGcgGacgaggtgtGcgGGacggTgtctggTggGaaacaagggcgTga                                         | GCTGACGTATCACTACCGGG-3' |                                                |     |

**Supplementary Figure 1.** The alignment of *ApTRE* (A) and *ApTPS* (B) isomers with PCR primers and PCR products. (A) Five *ApTRE* isomers (XM\_001950229.4; XM\_003245847.4; XM\_016808594.2; XM\_003247977.3 and XM\_029491831.1) and (B) two *ApTPS* isomers (XM\_003244776.4 and XM\_001943581.5).

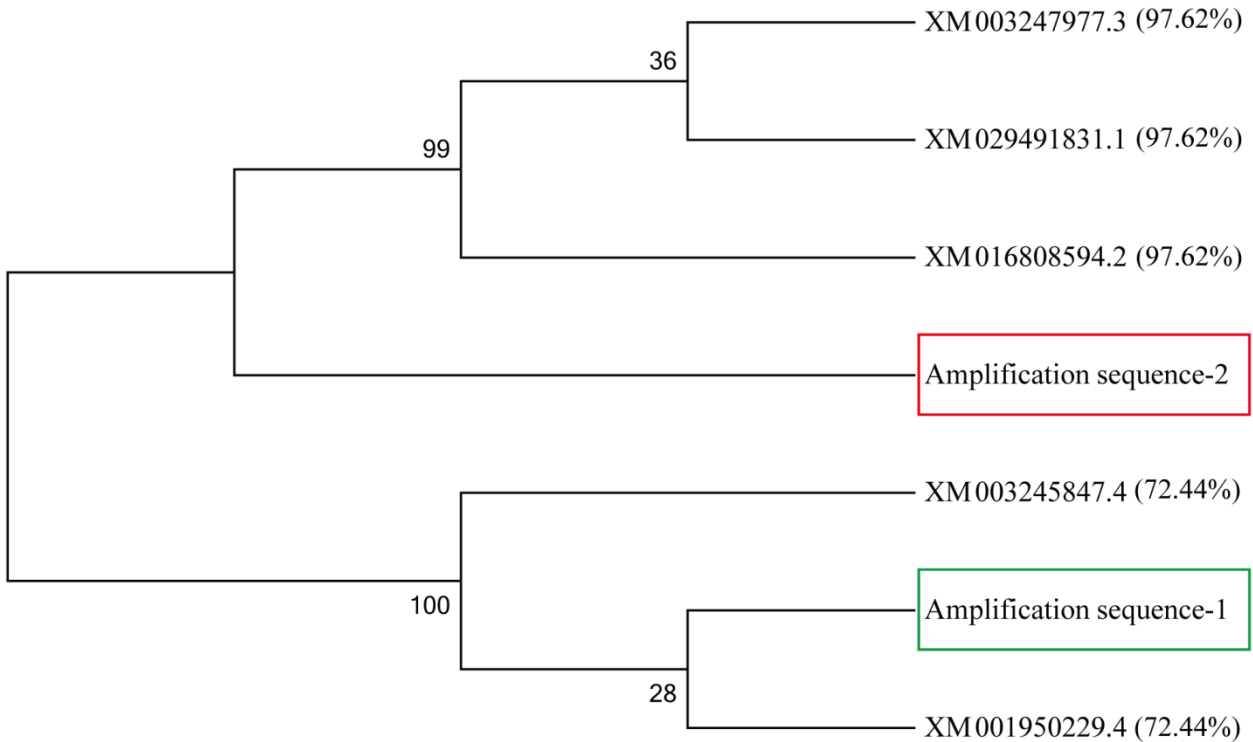

**Supplementary Figure 2.** Phylogenetic tree of *ApTRE*. The tree generated through ClustalW alignment using MEGA 7.0. The bootstrap values, expressed as percentages of 1000 replications, are shown at branch points. Amplification sequence-1 of *ApTRE* is highlighted with a green box and amplification sequence-2 of *ApTRE* is highlighted with a red box. The sequences were obtained from GenBank under the accession numbers: XM\_016808594.2, XM\_003247977.3, XM\_029491831.1, XM\_001950229.4 and XM\_003245847.4. The *ApTRE* amplification sequence-2 by *ApTRE* primer: CTAAATACTTGGAAGACGCAGAGTGCAATTTAACAGAACACTTACCTCTTTGAAGACTCATCCCAACTCTGTTTGTCCCACTGCGCCGCCCTCCGCTCCAGTACATAATGGTATAAGGACGCCCAACTGGGCGACAAGTGGGCCAGGTTTTTTTTAGATTGGTGGAAAATGGTTACCCTCCACTTATATACTTTTTGCACAGAAATTGGGATGTTCCCTGCTATGATGTTCTAGCATCGGTAGATTTTGCTGGCATGGAGGTGAATACGAGGTGCAGCTAGGTTTCGGCTG.

>XM\_001943581.4 PREDICTED: *Acyrtosiphon pisum* alpha, alpha-trehalose-phosphate synthase [UDP-forming] (LOC100165203), transcript variant X1, mRNA

AGCTGCAGTGGCGTTACAACAAATAATTACGATCATAGATCCGCGAACGAACCTCATCGAACGTTATATTATAATATATTTTTATTGCCATTCACGCGA  
CCAATGTGCTTTAATAATATCATAAATCCGTATCGAACTCGTATGTGGTGTAACTGTGCAATAATAATGCCTATAAACGAGTGAATCTGATAACACA  
ATAAAATATGATAACACAAAATGGTAATGATCGAATTTCCCAACCCACGCAGCATAATACGTTAATCGCGCTACGGTGTGTGCGTATTATAATATTA  
AGTTGTCTTGGTCCGATTACGATAAGGACGCGTTTTATTTAATATATAAACCGGAGCCGTACAACAGACAGATAGTCTACAGTCAACACTCGAAC  
GTTTCGCATTGTCTCAACTGCAGTCTGATCAATCAATCGATATAACAAATACACATACGTAATAGAAATATAATAATAATATCATCTCAACAATCGCGTC  
ACCATCATGGCCAGCCGCCGTGTAAGCATCAATGATTACGACTCCAATGCGCCAGTAACTTATCCGGACCAACGGTCAAAAATTTATCCGGCATGG  
GAAACAAAAAAGAGAGATCAACGCGCTCTCATCGTAGTTTCCAATCGACTTCCGTTGTTTGGGTAAAAATCGACAGCGGAGAATTAGTGGCG  
AAACAAAGCGCGGGTGGTCTTGTAAACGGCCGTCGCTCCAGTTGTTGTCGAATGAAAGGCACATGGATTGGATGGTCTGGTTCGTTTGATTAAAA  
CCCAATGATCCAATCCGGAATCCGATCCGGAAGACAAAGCTCTACCCTGGACTCAAATCTAGTCAAATTTATCCGGTACACTTAGATAAACCGG

AAATTGAAGAATTCACAATGGTTGTTGTAATGGCACGTTTTGGCCCTATTTCACCTCGATGCCACCGACCGTGGCAATTCGTTTCTAGGGACTGG  
RT-qPCR Primer Forward 5'-ACCGACCGTGGCAATTCGTTT-3'  
AAAACGACTGCAAAGTAAACGACAAGTTTGCCGATTGCACGCTGGACGCCCTGCGGGATGCTATAAAATCCCTAGACGACGCTGGAGATCACCA  
RT-qPCR Primer Reverse 5'-CG  
AACAGCCCCCTTGGTTTCGATTTCATGATTATCAGTTACTGACGACCGCGACCAAAATCCGTCAGGTGTGCGAAGCCGAAACCTCAGGTGTAAGCT  
AAACCAAGGGGGCTGTTG-3'

GGGATTCTTCTTGACATACCGTTCCCGTCGTGGGACATTATGAGGTTGTTGCCCTGGGACGACCAAGTCTCCAGGGAAATGTGGCTTACGATTTC  
ACCGCCTTCCACATCGAGGACTATTGCTTGAATTTTATTGACTGCTGCTGTCGGCGGCTGGGTGCCGCTGGACCGGACCAACATGCTGGTGGAG  
CTGGCCGGACGGACCATAAAGTGAAGGCGCTGCCGATTGGCATAACCATTGACCGTTTCGTGCAACTATCGGAGAAGGCGCCGGCGTTCTAAAC  
ATGTCAGAAGATGTAAGGTGATACTGGGCGTGGACAGGCTGGACTACACCAAGGGTCTGGTGCACCGAATCCTGGCGTTCGAGAAATCTTGGA  
CAAGTACCCGGAGCACCGGAAAAAGTGGTGTCTGCTGCAAATCTCGGTGCCATCCAGGACGGACGTCAGGAGTACAGCAACTCAAGGACGAG  
ACCGAGCTGCTGATCGGCCGATCAACCGAAGGTTCTCGATGCCAACTGGTCAACCGATCCGTACATCTACGGGTGCCTGAGCCAGGAGCAGCTG  
GCCGCCCTGTACCGAGACTGCGCGGTGGCATTGGTGACGCCGCTCAGGACGGCATGAACCTGGTTGCCAAGGAGTTCGTGGCGTCCAGATCCG  
GACGCCGGTGTGCTGATCCTGTACCATTCGCCGGCGCCGGTGGCACCATGCATGAGGCGCTACTGGTCAACCCATACGAGCTGGACGAGATGGC  
CAACGTGCTGCATCGAGCCCTGCGGATGCCGCTTGCAGAGCGTGAACCTGCGCATGACACAGCTCAGGACCCGAGAACAGCTGCTGGACGTCAACT

ACTGGATGACGTCGTTCTTCTCGTCGATGGCGCGCTCAGCGACGGTGGCGGTGACAGCGATGCAAAACGGCGGTATCAGCGGATGCAACCTACCA  
dsRNA PCR Primer Forward 5'-GGATGCAACCTACCA  
CCCAAGAGCATGCAACTGCAGCTGGATGATTCGACATGTACCTGAGCAACCACATTCGCGGCCGCTGGCAAGCTGAGTCTGATCTTGGACTACGAC  
CCCA-3'  
GGCAGCTCAGCACCTCACGTACACCCGACCTGGCCGTTATGTCCGAGGAGACGGTCAAGGTGCTGCAGCGGCTCAGCCGAATGCCGGACGT  
GAACATCGCCATCATTTCAGGCCGAACGCTGGACAACGTCAGTGGTGGCATTGAGAACGTGACGTACGCGGGCAGCCACGGTATCGAGA  
TCTGCAACCCAGACGGCACCAACTTCGTGACCCGGTGGCCAGGAGTATGAGCAAAAGGTGGCCGAGCTGCAGAAGGTGCTCGCGGACGAGGT  
GTGCGGGACGGTGTGTTGGGTGGAGAACAAGGGCGTGTGCTGACGATCACTACCGGGAGGTGCCGCTCGCCCTACGCGAACACCTGGAGCGC  
dsRNA PCR Primer Reverse 5'-CCCGTAGTGATACGTCAGCT-3'  
CGAGCGGTGAGATATTTGAGGCAGCCGGGTTGAGCCGCACCGTGGGTTCTGGCCATCGAGGGCAAGCCACCCGTTACGTGGGACAGGGCCG

CGCGTCCATTACATACTGCGCACACATAAGGAGTGCAGTGGTCCGAGCGGGTGCCTGCTGTGACGCTGGCAACGAGGACGCCATGCTGTCGCT  
CCAGGGCATAAGCATGCACGTTCCGCGTCGACCCATCGCCGATGGTCCAGACGGCCGACAGCTTCCGGCTGTCGGTCCCAGCCGCTGCTACCAT  
GCTCAAGTGGGTGGAGAAGGAGATGCACAAACGGCTGCCGACGCTCAGCGCCGGACGGTCAAGTATAGCCGGGTGCAGAACGCTGCGCTGGC  
GCACAGCATCCGGTGCAGATGAGCATCGACCAGAAAGGAGGAAAAGGAGAAGATGATCCTGCTGGCCGGAGGTCTAAGCTCACCACCT  
TGAGCGGCCGTTGAAAAGGATTAGTAAGACTAAGCACGCAACACGCCGCTTACGACATTTAATTGATGATCATAACTGTACTCGACGGCATGAC

**Supplementary Figure 3.** The positions of RT-qPCR and dsRNA primers for *ApTPS*. The green and red sequences were target sequences and primers sequences, respectively. The blue rectangular box indicated RT-qPCR primer and target sequences, and the black rectangular box indicated dsRNA primer and target sequences.



>XM\_003245847.3 PREDICTED: *Acyrtosiphon pisum* trehalase (LOC100161043), transcript variant X1, mRNA

```
TGGGTC TTGCGT TCCGATAAAGGCGCATTGTACGCTGGTCATTAGTGCAGTCGATTCGTGCAAGGCCTGTGGGAAACCTGTGAAGGAGTCTCAGGG
TCCAAC TTAATAAATCTCACTTTTTGTGTTTTGTTTTTAATATTCAAATTTTAATTGAAAAAATAAATATTTTACTTCAAAAATAGATTATTATACA
GATTATGCTAGTTTATTGGAAGAAATAAAATATAAATATTTTCTCTGTGTACACAATATCCGCGAATTATTGTAATTCGTTCAATATTTTGAA
ACTATGCGTATTACTAACTTACTGGTCGTGTGTCTGGCACATTTTGCCTATTACACACATGCAAATAATCAGGAATTTGTTCAATTTGGCAAGAGGATAT
TATCACGTATCCAATGGACTTCAGGCATCGTGTCAAAGCCAAATATACTGTGAAAGTGATCTACTGAAGGACGTACAAC TAGCTCACATTTTCCAG
ATTGCGAAAAC TTTTGTGGATATGAAACTAAAATACTCAGAATCTGAGATTTAAAAAACTACCAAGTATTGAAAGACGGTAACAACGGTGTAGTGGC
CAAAGAAAAGATAGTTAAATTTGTGCGACGAACATTCATGGACGGTGATGAGTTAGAGGTATGGACCCTTCCGACTTAATGAATCTCCTTCGATC
CAA
GCCAATCGGATTAAGACAAGAATTCAAACAGTGGGCATTGGGATTAACCAAGTATGGAACCCTAGCGAGGAAAGTTAAGGACGACGTGAG
RT-qPCR Primer Reverse 5'-TCCCAATGCCCACTGTTGT
ATTACATCCTGACAGATATTCGCTGATATGGGTTCCAAATGGTTTTGCCATACCCGGAGGCCGATTAGAGAAC TTTACTATTGGGACACGTA CTGGA
TTGTTAACGGGATGTTATTGTGTGACATGTCGACAACAGCTAGAGGTGTTATTGACAATATATTATCGTTGGTGTGCAATTTGGTTTCATGCCGAAT
GGTGGACGAGTGTACTACCTGAATAGATCACAACCGCAATGGTGACGTTGATGGTATCAAGCTACTATAAAGCAACCAACGACTTTGAATATGTAA
AAAAAGTCATATCTATCTTAGATAGTGAATTCGAGTTTGGACGGAAAACCGAATGGTTACTTTCGAGAAGAACGGCAAAATCGTACACAATGGCAA
GATACTACGCACCGTCAAGGGGTCCAAGACCAGAGTCTTATAGAGAGGACTACGAATCAGCAGAAATTTTGAAAAC TGAACGAAAAACAAGAA
TTGTATACCCAAATTAAGTCTGCGGCAGAGACCGGATGGGACTTTTCAAGTAGATGGTTATAACTGCCAACGGCTCGGATCGTGGGATATTGGCTG
ATATAAAAACGACGTATATAATACCAGTGGATTGAACTGTATATTGCACAAGAATGCACTGTTGTTGAGTTCGTGGTATAGTAAGATGGGAGATACA
ACTAAAGCCGAGAAATATCGTGCATCGCTGAGAACTCGTCTACAGTATACAAGAAGTTATGTGGAGACCAGACCTAGGGCGTGGTTGACTGG
GATATGTTGAATAATAAAGTGCAGAAATTTTTTCGTTTCCAATATTGTACCTCTATGGACAGAAAGCTACAATATGCCGAAAAGGCTGTAGCTAG
GATA
TTCAGTGTGGGATATCTAAGAGATCATCATATCATCGAAGCCGATTATACTGTGAATTTAACGGAACACCTACGTCTTTGTACAAATCATACAACA
GTGGGACTTCCAAATGCGTGGCCTCCTCTACAAGCTTTCATCATCAAGGTCTAGACAGGACACAACAGAACTGGCACAACAGGTGTCATTAG
ATTGGCTGAAGTTTGGTTACGCTCAAATATAATCATTCCGAGAGAAATCAATGATGTTGAAAAATATGATGTTCTAGCATCGGGAGAACTGGT
GGCGGTGGTGAATATACTCCGCAGACAGGTTTGGTTGGACAAATGGAGTCGTGTTGAGTTTTAAATAGATGGGGCGATACATTATCTAACGGGA
dsRNA PCR Primer Reverse 5'-CAACCAAACTGTCTGCGG-3'
TAAACGGATGTACTACCGTTATAGATATTTGTGTGATTTCAATAGGATCAGACAACAGTTAATGTTTTGGACTTGAGAAGACACGGGTAATCGTCTT
ATTCGCCATGCACCGGAAAAC TATTATACTTAGGTACCTAATTAATTTACCATGCGTCAAACGGCTGAAACGCTGATAAATTTTATTCAAAGAAGA
AACTCAGTATTAATTAATTATTACATAATAATTTTATTATCTAAAAAATATATTTTATAGATAATTTTATTAAACAAAAGACAACACATACCTAGAATT
ATTGATTTTTTATACACAAAAACAATGCAACGCGAAATAACATATGTTTATTGATAAATAATTTGTTAAAATATTGTTTCATTTATATACATTGTATAA
GATAGTTTACTACTGTTTAAATTAATAAGGAATTGTTGTTGATGTTAAIATATTAATAAAGAACAGGC AATTTTAAATAGTTAAAATACTTGTA
TTATATATATACACTTTTTTGCATGTACAACAGGIATTTGATATGCCTTATTAATTTATTGAAATATATAAAAAAATTGAAAAACAA
```

**Supplementary Figure 4.** The positions of RT-qPCR and dsRNA primers for *ApTRE*. The green and red sequences were target sequences and primers sequences, respectively. The blue rectangular box indicated RT-qPCR primer and target sequences, and the black rectangular box indicated dsRNA primer and target sequences.

A RNAi of *ApTPS* at 48 h

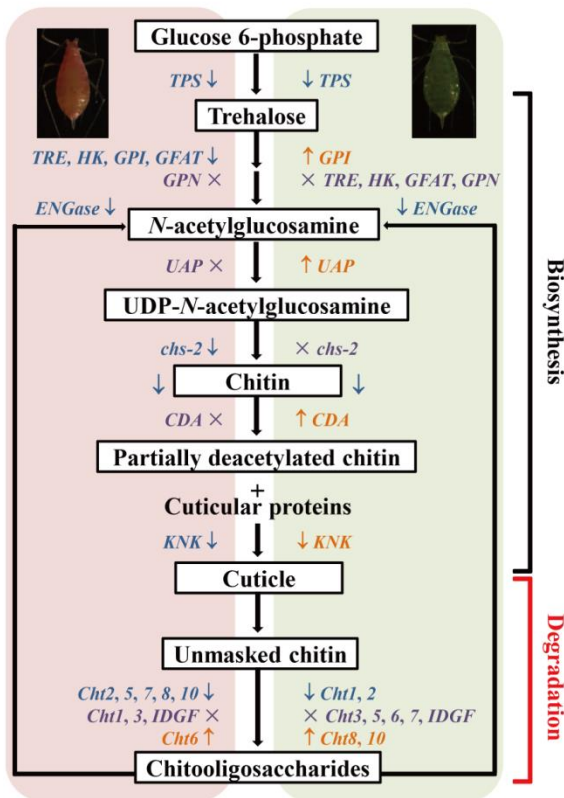

B RNAi of *ApTRE* at 48 h

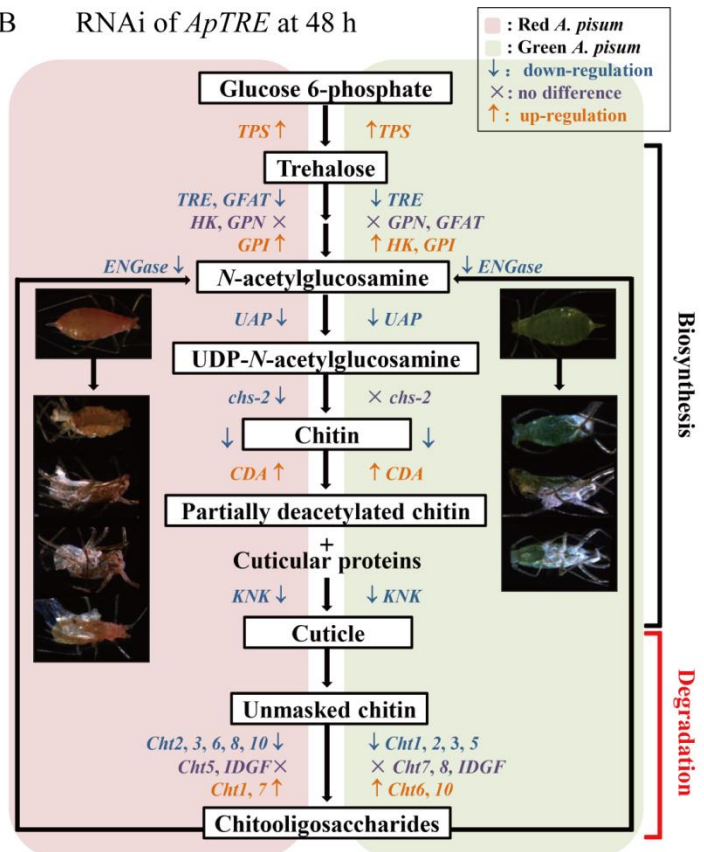

**Supplementary Figure 5.** Key enzymes and genes involved in chitin biosynthesis and degradation in *A. pisum*. (A) Effect of RNAi of *ApTPS* on chitin metabolic pathway at 48 h. (B) Effect of RNAi of *ApTRE* on chitin metabolic pathway at 48 h. The colour of pink represents the red *A. pisum*, the colour of greenish represents the green *A. pisum*, the blue ↓ and letters represent down-regulation mRNA expression, the purple × and letters represent no difference, the orange ↑ and letters represents up-regulation mRNA expression.
